# Supplementary material for: Rational design of one-dimensional triarylamine-based covalent organic frameworks for perovskite solar cells with improved efficiency and stability
Source: Royal Society of Chemistry journal article supplement (doi:10.1039/d4ta03516j), 2024-01-01
Supplement: d4ta03516j1.pdf [file d4ta03516j1.pdf]

## SUPPORTING INFORMATION

---

•

# Supporting Information

## Rational Design of One-dimensional Triarylamine-based Covalent Organic Frameworks for Perovskite Solar Cells with Improved Efficiency and Stability

Jun He<sup>[a, b]</sup>, Longfei Yuan<sup>[a, b]</sup>, Sixiao Gu<sup>[a, b]</sup>, Jiavax Bai<sup>[a, b]</sup>, Yaxin Li<sup>[a, b]</sup>, Shirong Wang<sup>[a, b]</sup>, Dewang Li\*<sup>[c, b, d]</sup>, Hongli Liu\*<sup>[a, b]</sup>

---

[a] J. He, L. Yuan, S. Gu, J. Bai, Y. Li, Prof. S. Wang, Dr. H. Liu\*

School of Chemical Engineering and Technology, Tianjin University

Tianjin, 300072, People's Republic of China

E-mail: [liuhongli@tju.edu.cn](mailto:liuhongli@tju.edu.cn)

[b] J. He, L. Yuan, S. Gu, J. Bai, Y. Li, Prof. S. Wang, Dr. D. Li\*, Dr. H. Liu\*

Collaborative Innovation Center of Chemical Science and Engineering (Tianjin)

Tianjin, 300072, People's Republic of China

[c] Dr. D. Li\*

Institute of Molecular Aggregation Science, Tianjin University

Tianjin, 300072, People's Republic of China

E-mail: [lidewang@tju.edu.cn](mailto:lidewang@tju.edu.cn)

[d] Dr. D. Li\*

Tianjin Key Laboratory of Molecular Optoelectronic Science, Tianjin University

Tianjin, 300072, People's Republic of China

## Section S1: Materials and General Methods

### 1.1 Chemicals

Mesitylene, and nitrobenzene were purchased from Acros Organic. Imidazole, Trifluoroacetic anhydride, Tri(4-aminophenyl) amine, *p*-Toluidine, Aniline, *p*-Fluoroaniline, 4-Trifluoromethylamine were purchased from Aladdin. Dichloromethane (CH<sub>2</sub>Cl<sub>2</sub>) and Petroleum ether (PE) was purchased from Admas. Trifluoroacetic acid, conc. Hydrochloric acid (36 wt % in water), NaHCO<sub>3</sub>, MgSO<sub>4</sub> and Toluene were purchased from Jiangtian huagong (Tianjin, China). Acetone (> 99%), Chlorobenzene (> 99.8%), Tetrahydrofuran (> 99%), 1,4-dioxane (> 99%), Dimethyl sulfoxide (DMSO, > 99.5%), N, N-Dimethylformamide (DMF, > 99.8%), Acetonitrile (>99%), Methanol (>99%), 2-Propanol (>99.5%), hydrobromic acid (47 wt % in water), hydroiodic acid (57 wt % in water), *d6*-DMSO, were purchased from Sigma Aldrich. Methylamine hydrochloride (MAH), PbI<sub>2</sub> (> 99.9%), PbBr<sub>2</sub> (> 99.9%), PbCl<sub>2</sub> (> 99.9%), Spiro-MeOTAD (> 98%), PEDOT:PSS and PC<sub>61</sub>BM were purchased from Xi'an Yuri Solar Co., Ltd. FTO glass, Formamidinium iodide (FAI), 4-*tert*-butylpyridine (t-BP, > 98%) and lithium bis(trifluoromethylsulfonyl)imide (LiTFSI, >99.95%) were purchased from Yingkou Youxuan Technology Co., Ltd. SnO<sub>2</sub> colloidal solution (15 wt% in H<sub>2</sub>O) was purchased from Alfa Aesar.

### 1.2 Analytical techniques

Fourier-transform infrared spectroscopy (FTIR) spectra were recorded on FTIR-650 (Tianjin Donggang). Powder X-ray diffraction (PXRD) patterns were collected from Mini Flex 600, Rigaku, X-ray diffraction analysis platform with Cu K $\alpha$  radiation ( $\lambda = 1.5418 \text{ \AA}$ ). Samples were observed at a scan speed of 10.0 deg min<sup>-1</sup> from 2-35° for COF and 2-60° for PbI<sub>2</sub> or perovskite film on FTO. Ultraviolet-visible (UV-vis) absorption spectrum was obtained from the UV2600. Ultraviolet-visible-near IR (UV-vis-NIR) absorption spectrum was obtained from the PerkinElmer Lambda 950. Nuclear magnetic resonance (NMR) spectra were obtained on an NMR Bruker 500 MHz operated at room temperature. Transmission electron microscopy (TEM) and high-resolution transmission electron microscopy (HR-TEM) images of the powder was taken by JEOL F2001 operating at 300 kV for morphology and JEOL F200 for mapping. The powder dispersed in ethanol. After ultrasonication for 15min, the solution was dropped on TEM grids for testing. Cross-sectional Scanning Electron Microscope (SEM) and top-view SEM images were taken by a field emission scanning electron microscopy Hitachi UHR FE-SEM SU8000. X-ray photoelectron spectroscopy (XPS) and ultraviolet photoelectron spectroscopy (UPS) were measured using a photoelectron spectrometer Kratos Analytical, ESCALAB-250Xi and the He(I) excitation was 21.22 eV. Steady-state photoluminescence (PL) was measured with HORIBA Scientific FluoroMax-4 with excitation wavelength 500 nm. Time-resolved photoluminescence (TRPL) was measured using a HORIBA Fluorolog-3 spectrometer equipped with a 450 W Edinburgh Xe900 Xenon lamp as the exciting light source. *J-V* curves were obtained using a Keithley 2400 source under one simulated sun illumination. The AM 1.5G spectrum was obtained from an Oriel 300 W solar simulator and calibrated to 100 mW cm<sup>-2</sup> using a standard Si solar cell (NREL, Newport). During the test, the active area of the devices was controlled at 0.04 cm<sup>2</sup>, and the scanning speed was 100 mV s<sup>-1</sup>. The incident light-to-electron conversion efficiency (IPCE) was obtained through the IPCE test system

## SUPPORTING INFORMATION

---

(E0201a, Chinese Academy of Sciences)\_under DC mode condition, where monochromatic beam was generated by a CHF-XM-500 W Xenon lamp. Electrochemical impedance spectroscopy (**EIS**) was measured with an electrochemical workstation (Vertex. +One. EI, Ivium) via a bias voltage -0.8 V. Film thickness were determined by Alpha-Step D-300 Stylus Profiler. Atomic force microscopy (**AFM**) images were recorded in tapping mode on a Bruker Dimension icon. The **Contact Angles** were measured using a JC 2000D contact angle instrument. Particle size analysis was tested by Delsa nano C particle analyzer (Beckman Counter). Solid state NMR (**ssNMR**) spectra were collected using AVANCE II 400M. Low-pressure **N<sub>2</sub> adsorption measurements** were carried out on a Micromeritics ASAP 2420 surface area analyzer. A liquid N<sub>2</sub> bath was used for measurements at 77 K.

## Section S2: Synthesis of COFs

2.1 Synthesis of TPB-CHO linker<sup>[1,2]</sup>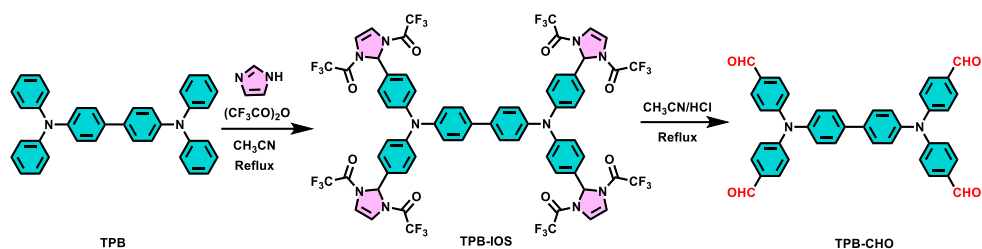

**Figure S1.** Schematic route to the synthesis of the TPB-CHO.

*1,1',1'',1''',1''''',1''''''',1''''''''',1'''''''''''-((([1,1'-biphenyl]-4,4'-diylbis(azanetriyl))tetrakis(benzene-4,1-diyl))tetrakis(1H-imidazole-2,1,3(2H)-triyl))octakis(2,2,2-trifluoroethan-1-one) (TPB-IOS)* : To a solution of imidazole (1.36 g, 20.0 mmol) in acetonitrile (30.0 mL) was added dropwise trifluoroacetic anhydride (10.5 g, 50.0 mmol) under an argon atmosphere. The mixture was refluxed for 1 h, and then cooled by removal of the oil bath. *N,N,N',N'*-tetraphenylbenzidine (TPB, 1.96 g, 4.0 mmol) was added to the mixture, and then the reaction mixture was refluxed for 20 h. After cooling to room temperature, the reaction mixture was treated with ice to give a green precipitate, which was filtrated and washed with water and ethanol. The precipitate was dissolved in  $\text{CH}_2\text{Cl}_2$ , washed with saturated aqueous  $\text{NaHCO}_3$ , and dried over  $\text{MgSO}_4$ , and the solvent was removed under reduced pressure to afford a greenish-yellow solid (, 6.10 g), which was used for the next step without further purification.

*4,4',4'',4'''''-([1,1'-biphenyl]-4,4'-diylbis(azanetriyl))tetrabenzaldehyde (TPB-CHO)*: To a suspension of this crude product in acetonitrile (200 mL) was added a dilute hydrochloric acid (20 mL of conc. hydrochloric acid and 100 mL of water) under an argon atmosphere. The mixture was refluxed for 6 h, after cooling and neutralization with saturated aqueous  $\text{NaHCO}_3$  to PH = 7. The flittered dark red participation was dissolved in  $\text{CH}_2\text{Cl}_2$ , and the residue was chromatographed on silica gel ( $\text{CH}_2\text{Cl}_2$ :PE = 3:1 as eluent) to afford TPB-CHO (1.98g, 83%) as a bright-yellow solid:  $^1\text{H}$  NMR (400 MHz, *d6*-DMSO)  $\delta$  (ppm) 9.92 (s, 4H), 7.81 (d,  $J$  = 8.6 Hz, 8H), 7.62 (d,  $J$  = 8.5 Hz, 4H), 7.25 (dd,  $J$  = 8.1, 3.0 Hz, 12H).  $^{13}\text{C}$  NMR (150 MHz,  $\text{CDCl}_3$ ):  $\delta$  (ppm) 122.25, 126.26, 127.61, 130.43, 130.91, 137.72, 151.16, 189.63. MALDI-TOF-MS  $m/z$ : 647.115.

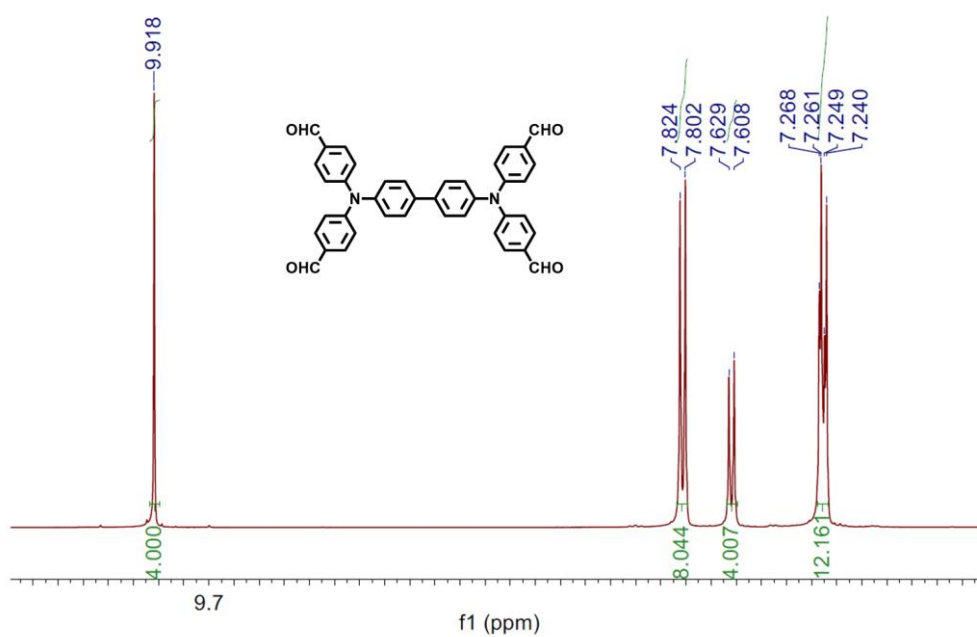

**Figure S2.** <sup>1</sup>H NMR spectrum of TPB-CHO.

## 2.2 Synthesis of [(TPA)<sub>2</sub>(TPB)<sub>1</sub>]-C=N-<sup>[3]</sup>

12.0 mg TPB-CHO (0.02 mmol), 12.0 mg tri(4-aminophenyl) amine (TPA-NH<sub>2</sub>) (0.04 mmol) and *p*-toluidine (45.0 mg, 0.42 mmol) were added to 1.5 mL nitrobenzene, and then completely dissolved by ultrasound for 10 min. Then, 0.5 mL methylene and 4 μL trifluoroacetic acid (TFA) were added, sealed and reacted at 85 °C for 120 h. After centrifugation and precipitation with ethanol (× 3 times) and THF (× 3 times), 16.9 mg of orange solid powder was obtained after vacuum drying. The theoretical yield was 22.2 mg (C<sub>304</sub>H<sub>224</sub>N<sub>40</sub>, 4437.29 g mol<sup>-1</sup>), and the yield was 76.1%.

## 2.3 Synthesis of [(TPA)<sub>2</sub>(TPB)<sub>1</sub>]-C=N-X

[(TPA)<sub>2</sub>(TPB)<sub>1</sub>]-C=N- (22.0 mg, 0.02 mmol) was dispersed in 5 mL THF, concentrated hydrochloric acid (2.0 mg, 0.05 mmol) was added, the mixture was vigorously stirred at room temperature for 30 min. After centrifugation and precipitation with ethanol for 3 times, 22.4 mg of dark black solid was obtained after vacuum drying. The theoretical yield was 23.6 mg (C<sub>304</sub>H<sub>232</sub>N<sub>40</sub>Cl<sub>8</sub>, 4728.98 g mol<sup>-1</sup>), and the yield was 94.9%.

[(TPA)<sub>2</sub>(TPB)<sub>1</sub>]-C=N- (22.0 mg, 0.02 mmol) was dispersed in 5 mL THF, hydrobromic acid 47 wt.% in H<sub>2</sub>O (9 mg, 0.05 mmol) was added, the mixture was vigorously stirred at room temperature for 30 min. After centrifugation and precipitation with ethanol for 3 times, 25.0 mg of dark black solid was obtained after vacuum drying. The theoretical yield was 25.4 mg (C<sub>304</sub>H<sub>232</sub>N<sub>40</sub>Br<sub>8</sub>, 5084.59 g mol<sup>-1</sup>), and the yield was 98.4%.

[(TPA)<sub>2</sub>(TPB)<sub>1</sub>]-C=N- (22.0 mg, 0.02 mmol) was dispersed in 5 mL THF, hydriodic acid 57 wt.% in H<sub>2</sub>O (11 mg, 0.05 mmol) was added, the mixture was vigorously stirred at room temperature for 30 min. After centrifugation and precipitation with ethanol for 3 times, 27.0 mg of dark black solid was obtained after vacuum drying. The theoretical yield was 27.3 mg (C<sub>304</sub>H<sub>232</sub>N<sub>40</sub>I<sub>8</sub>, 5460.59 g mol<sup>-1</sup>), and the yield was 98.9%.

## Section S3: Computational details

### 3.1 COF structure simulation

Computational modeling of the [(TPA)<sub>2</sub>(TPB)<sub>1</sub>]-C=N structure was carried out using the Materials Studio. The calculated PXRD pattern was generated with the Reflex Plus module using Pseudo-Voigt function. Finally, Pawley refinement was applied for profile fitting, producing the refined PXRD profile.

### 3.2 The binding energy and electron interaction of heterostructures

All calculations were conducted using the Vienna *Ab initio* Simulation Package (VASP)[4,5]. The COF adsorbed on perovskite (COF@perovskite) was simulated in a superlattice model, with lateral dimension  $\mathbf{a} = 20.002 \text{ \AA}$ ,  $\mathbf{b} = 13.006 \text{ \AA}$  and containing 358 atoms. The Spiro-OMeTAD adsorbed on COF structure was simulated in a superlattice model, with lateral dimension  $\mathbf{a} = 41.078 \text{ \AA}$ ,  $\mathbf{b} = 52.000 \text{ \AA}$  and containing 445 atoms.

The projector-augmented wave (PAW)[6,7] method was adopted to describe the core-valence electron interaction, and the generalized gradient approximation (GGA) formulated by Perdew-Burke-Ernzerhof (PBE)[8], was employed to treat the exchange correlation between electrons. The plane-wave cutoff energy was set to 400 eV. The energy criterion was set to  $10^{-4}$  eV in iterative solution of the Kohn-Sham equation. A vacuum layer of 15  $\text{\AA}$  is added perpendicular to the surface to avoid artificial interaction between periodic images, and dipole correction<sup>[9]</sup> was employed to improve the convergence.

$2 \times 3 \times 1$  and  $1 \times 1 \times 1$  Gamma-centered k-meshes were used for COF@perovskite and COF@Spiro-OMeTAD models, respectively, to calculate their electronic properties. All the structures were relaxed until the residual forces on the atoms declined to be less than 0.03 eV/ $\text{\AA}$ .

## Section S4: Preparation of PSCs

### 4.1 Fabrication of planar n-i-p PSCs

Fluorine-doped SnO<sub>2</sub> (FTO) conductive substrate was cleaned with deionized water, acetone, isopropanol and ethanol, each step taking 20 minutes. Oxygen plasma was treated for 10 min, 100W to clean further. The SnO<sub>2</sub> layer was deposited on the cleaned FTO substrate by spin coating using a SnO<sub>2</sub> colloidal solution diluted with water (1:5 v/v%) and annealing at 150 °C for 30 min at ambient atmosphere. A 1.5 M of PbI<sub>2</sub> solution was prepared by dissolving 691.5 mg of PbI<sub>2</sub> in 900 μL of DMF and 100 μL of DMSO. The PbI<sub>2</sub> layer was spin-coated on the SnO<sub>2</sub>-coated FTO substrate at 1500 rpm for 30 s, and annealing at 90°C for 5 min. Organic salts of FAI: MACl (172 mg: 42 mg in 2mL IPA) with/without COF-I were spin-coated on PbI<sub>2</sub> films at a rate of 2000 rpm for 30 s, followed with thermal annealing at 150 °C for 12 min in ambient air with a humidity (30~40%). After cooled to room temperature, the perovskite films were transferred into glovebox for hole transporting layer deposition. A spiro-MeOTAD layer was spin-coated at 4000 rpm for 30 s using the solution of 72.3 mg of spiro-MeOTAD, 28.8 μL of 4-tert-butylpyridine and 17.5 μL of LiTFSI (520 mg dissolved in 1 mL of acetonitrile) in 1 mL chlorobenzene. A gold electrode was deposited on the spiro-MeOTAD layer by thermal evaporation at an evaporation rate of 0.1~0.8 Å s<sup>-1</sup> for 80 nm thickness of Au metal contact.

### 4.2 Preparation of saturated COF-I IPA dispersion

Firstly, 5 mg of COF-I powder was dispersed into 20 mL of IPA and then sonicated for more than 24 hours to obtain the COF-I suspension. Then the solution was centrifuged at 6000 rpm for 5 mins, and the transparent supernatant fluid was collected. The insoluble solid after centrifugation was vacuum dried, the weight was about 1.0 mg. Thus, the concentration of the stable COF-I powder dispersions was about 0.2 mg mL<sup>-1</sup>. Then 10, 20, 30, 40 μL, 50 μL, 0.4 mg mL<sup>-1</sup> COF-I IPA dispersion mixed with 90 μL, 80 μL, 70 μL, 60 μL, and 50 μL 0.5 M FAI/MACl IPA solution afforded a solution with concentration of COF-I in IPA 0.02, 0.04, 0.06, 0.08 and 0.10 mg mL<sup>-1</sup>, respectively.



## Section S5: Figures

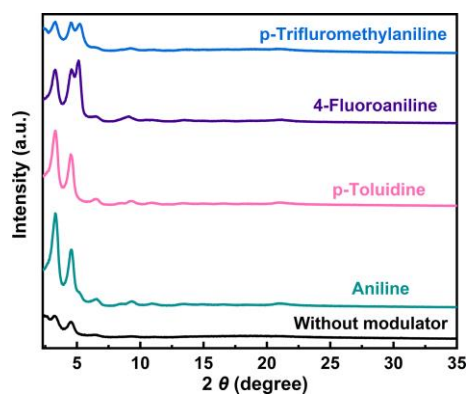

**Figure S3.** PXRD patterns of  $[(\text{TPA})_2(\text{TPB})_1]\text{-C=N-}$  with different anilines modulators.

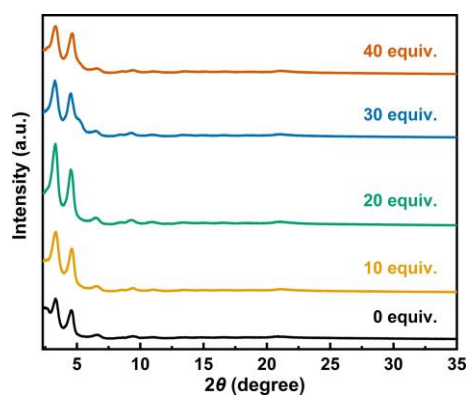

**Figure S4.** PXRD patterns of  $[(\text{TPA})_2(\text{TPB})_1]\text{-C=N-}$  with different equivalent aniline.

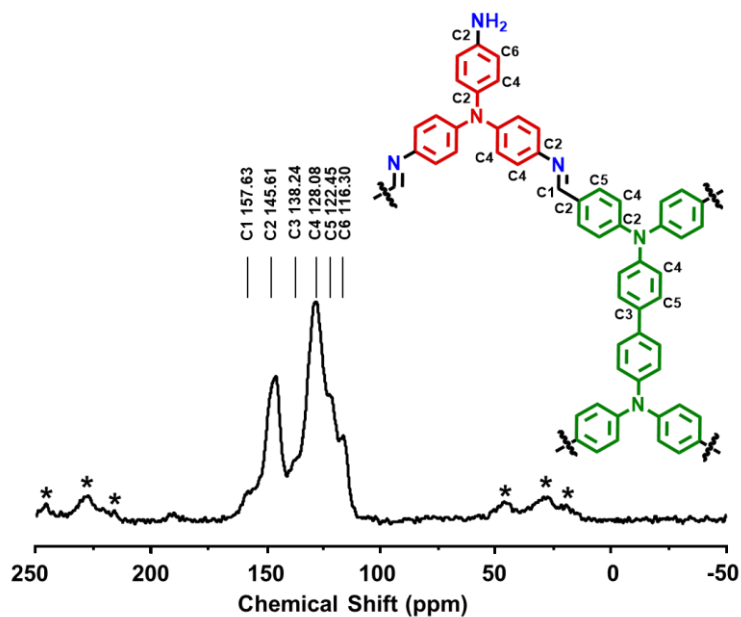

**Figure S5.** Solid-state  $^{13}\text{C}$  CP-MAS NMR spectrum of  $[(\text{TPA})_2(\text{TPB})_1]_{\text{-C=N-}}$ . The assignments of  $^{13}\text{C}$  chemical shifts are indicated in the chemical structure, which classified by their different chemical environment. Spinning sidebands are denoted with asterisks.

| Characteristic C Assignment | Signal (ppm)/Comments         |
|-----------------------------|-------------------------------|
| C1                          | 158 /Imine C=N carbons        |
| C2                          | 146 / $\alpha$ -amino carbons |

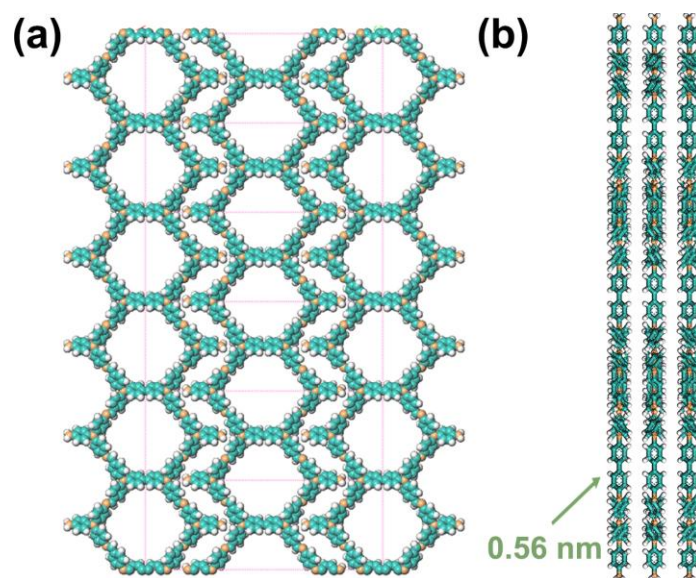

**Figure S6.** (a) The top-view and (b) side-view of the crystal structure of  $[(\text{TPA})_2(\text{TPB})_1]_{\text{-C=N-}}$ .

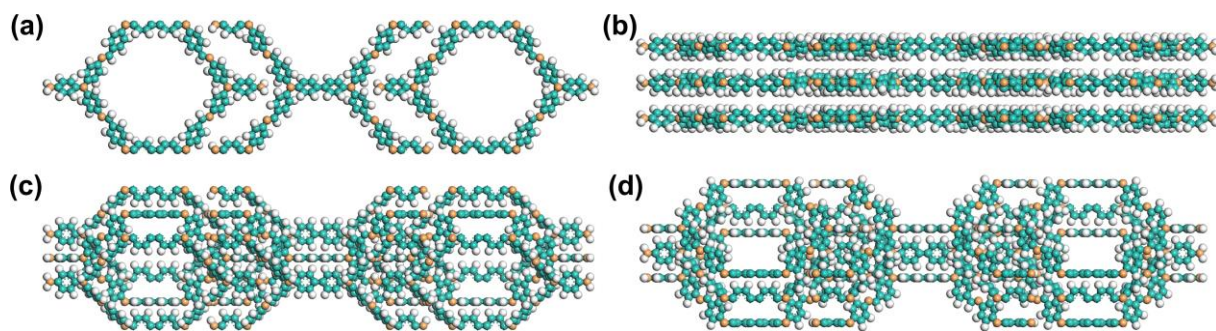

**Figure S7.** The original cell of  $[(\text{TPA})_2(\text{TPB})_1]_{-C=N-}$ .

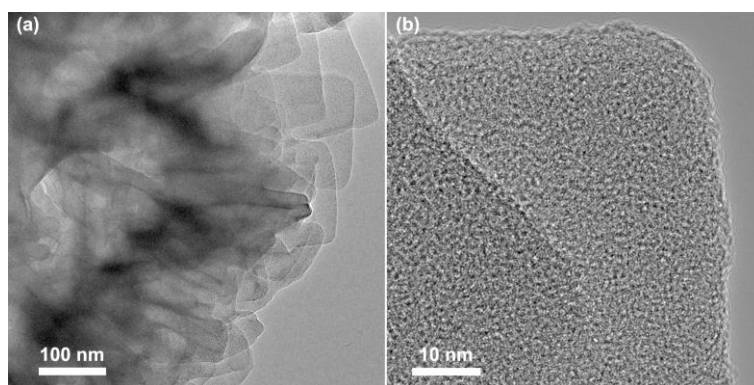

**Figure S8.** TEM images of  $[(\text{TPA})_2(\text{TPB})_1]_{-C=N-}$ .

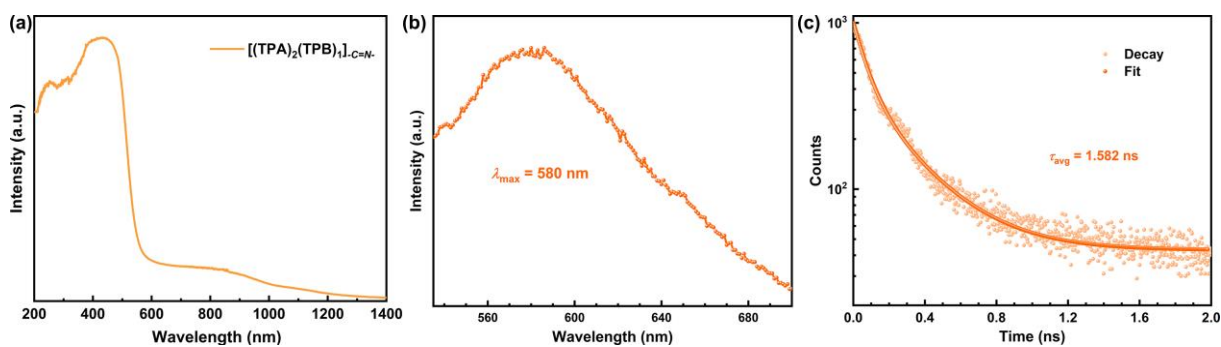

**Figure S9.** (a) UV-vis-NIR spectrum (b) Steady-state photoluminescence (PL) spectrum and (c) time-resolved photoluminescence (TRPL) spectrum of  $[(\text{TPA})_2(\text{TPB})_1]_{-C=N-}$ .

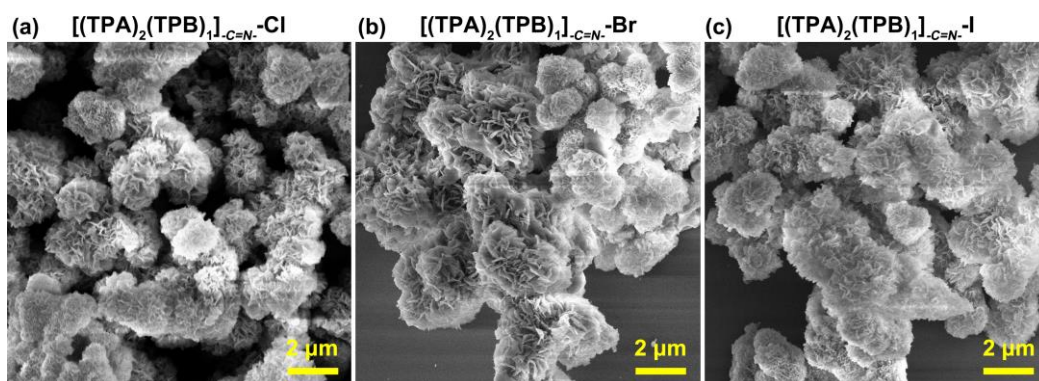

**Figure S10.** SEM images of COF-X (a)  $[(\text{TPA})_2(\text{TPB})_1]_{-C=N-}\text{-Cl}$ , (b)  $[(\text{TPA})_2(\text{TPB})_1]_{-C=N-}\text{-Br}$ , and (c)  $[(\text{TPA})_2(\text{TPB})_1]_{-C=N-}\text{-I}$ .

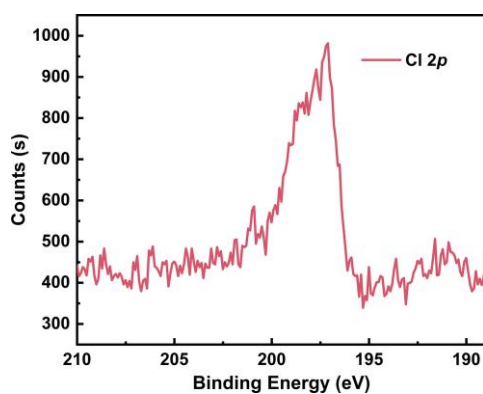

**Figure S11.** The Cl 2p spectra of  $[(\text{TPA})_2(\text{TPB})_1]_{-C=N-}\text{-Cl}$  powder.

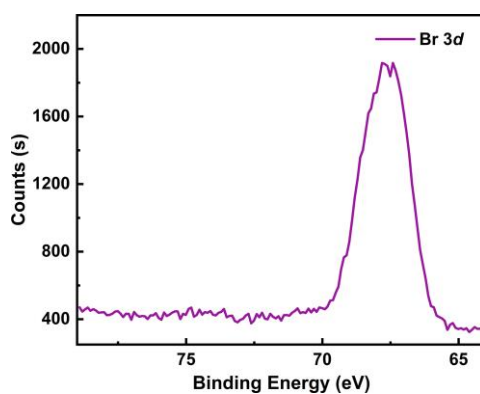

**Figure S12.** The Br 3d spectra of  $[(\text{TPA})_2(\text{TPB})_1]_{-C=N-}\text{-Br}$  powder.

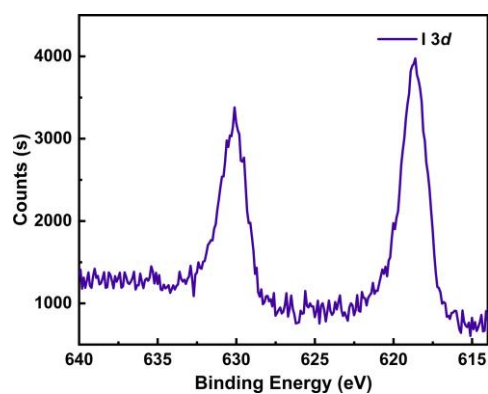

**Figure S13.** The I 3d spectra of  $[(\text{TPA})_2(\text{TPB})_1]_{\text{-C=N-I}}$  powder.

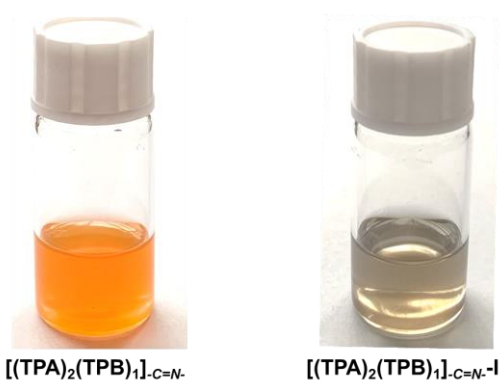

**Figure S14.** The 0.1 mg/mL supernatant of  $[(\text{TPA})_2(\text{TPB})_1]_{\text{-C=N-}}$  and COF-I powders in IPA.

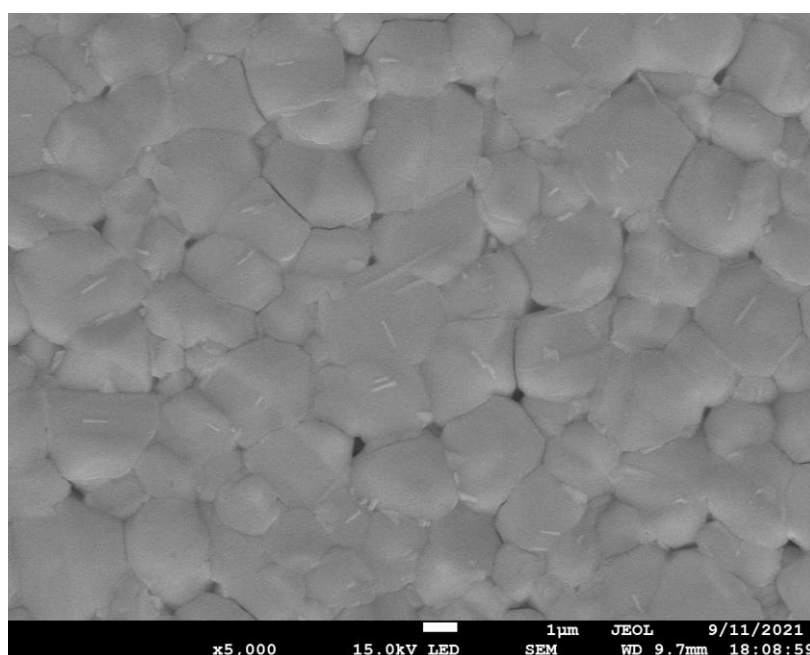

**Figure S15.** SEM images of the target perovskite film.

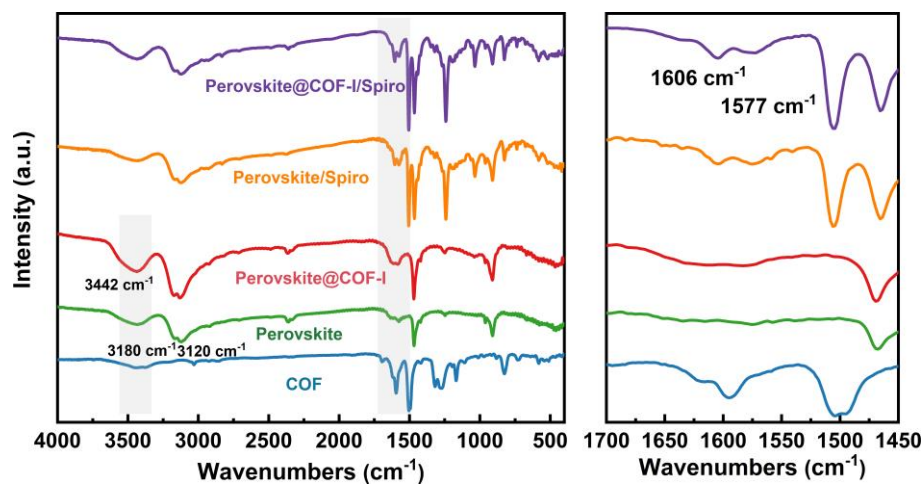

**Figure S16.** FT-IR spectra of perovskite, perovskite@COF-I, perovskite/Spiro-OMeTAD, and perovskite@COF-I/Spiro-OMeTAD films.

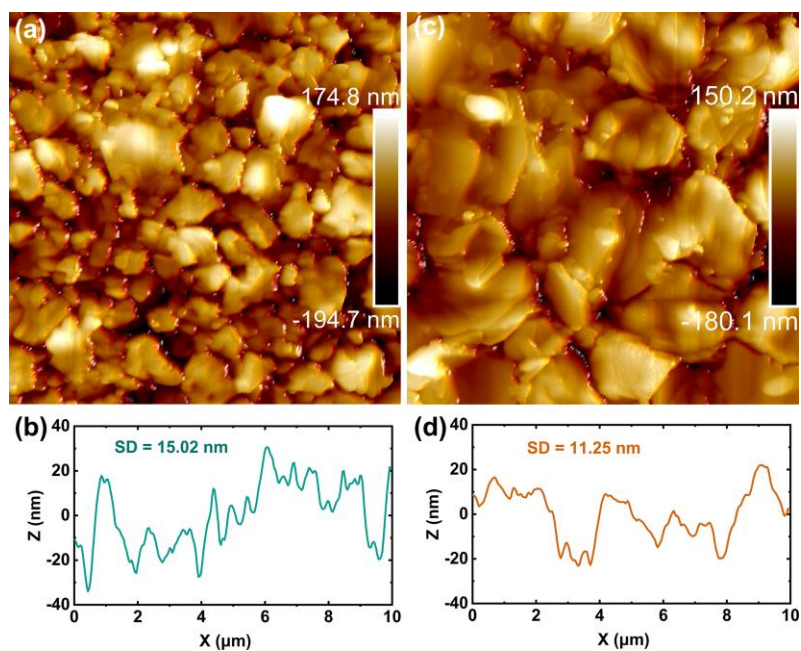

**Figure S17.** (a) AFM image of the perovskite film, (B) surface potential variations of the perovskite across the center line in a. (c) standard deviation AFM image of the target perovskite film. (d) surface potential variations of the target perovskite film across the center line in c.

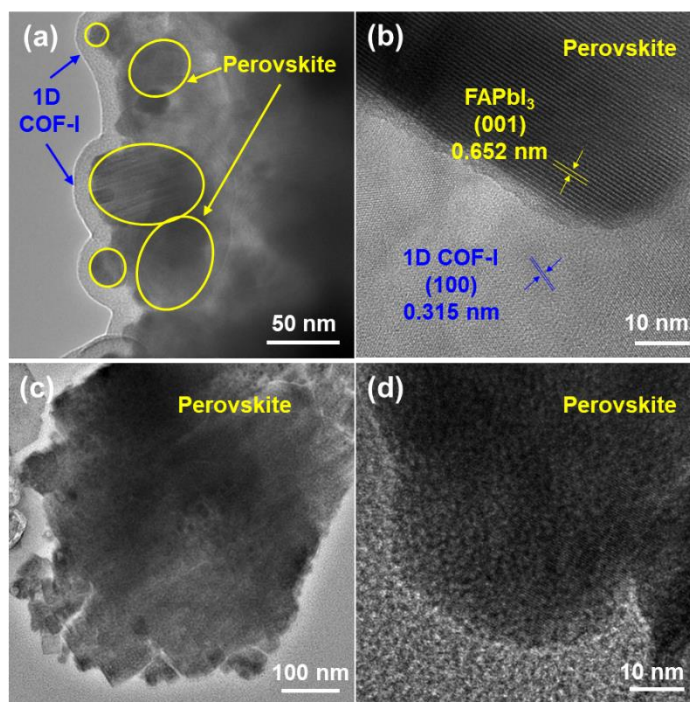

**Figure S18.** (a)TEM and (b) HRTEM images of the scraped powders from the perovskite@COF-I film, (c)TEM and (d) HRTEM images of the scraped powders from the perovskite film.

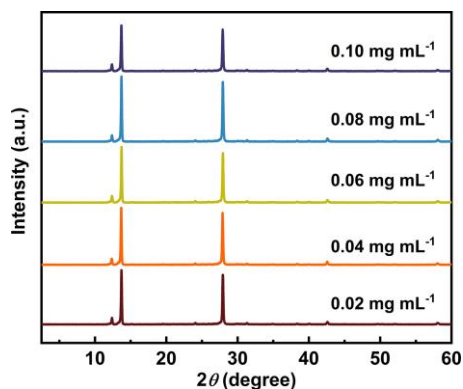

**Figure S19.** XRD patterns of perovskite films with different concentrations of COF-I.

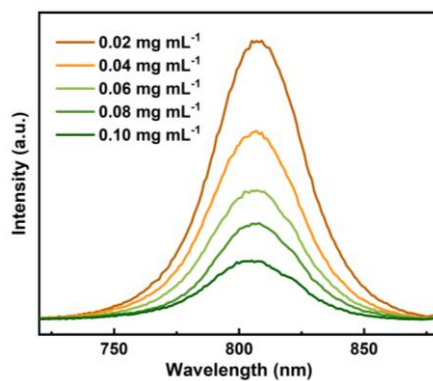

**Figure S20.** PL spectra of perovskite films with different concentrations of COF-I.

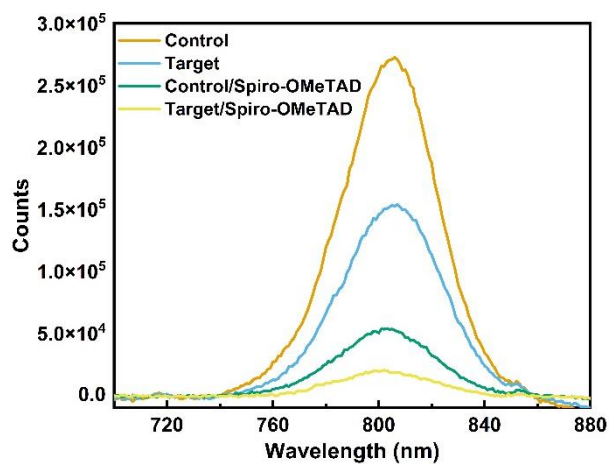

Figure S21. PL spectra of the control, target, control/Spiro-OMeTAD, and target/Spiro-OMeTAD films.

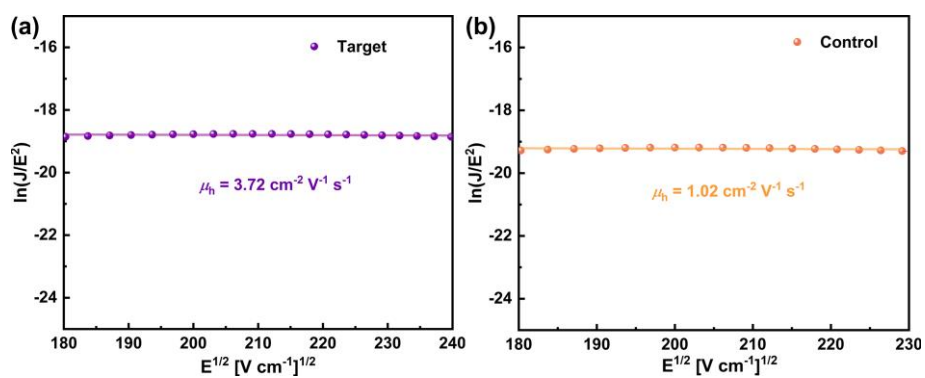

Figure S22. Fitting curves of hole-only devices.

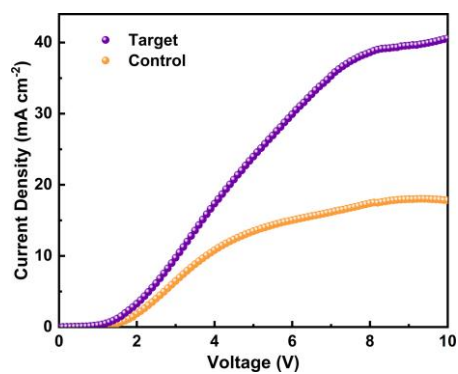

Figure S23.  $J$ - $V$  curves of hole-only devices.



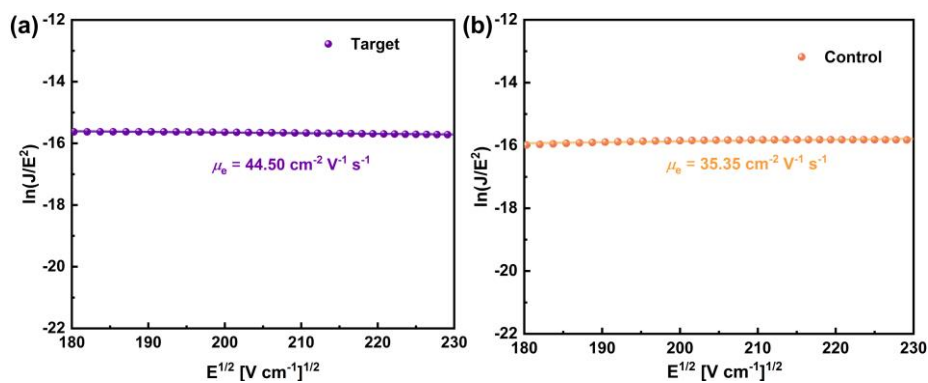

**Figure S24.** Fitting curves of electron-only devices.

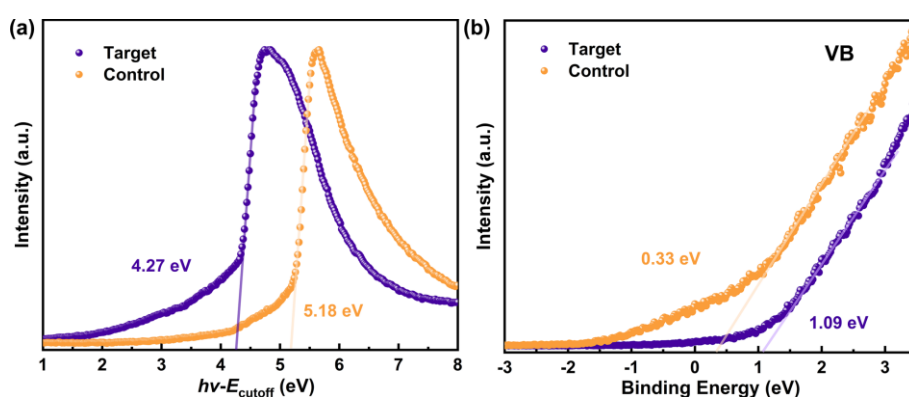

**Figure S25.** Characterization of (a) the working function and (b) valence band of the control and target perovskite films by UPS spectra. The valence band maximum (VBM) for perovskite films can be calculated through formula as  $E_{\text{VBM}} = h\nu - (E_{\text{cutoff}} - E_{\text{F}})$ , where  $E_{\text{cutoff}}$  can be received from high-binding energy secondary electron cutoff region as shown in Figure S22a;  $E_{\text{F}}$  is fermi energy level, which can be obtained from VB edge region as Figure S22b.. Thus, the VBM of the control and target perovskite film was calculated to be -5.51 and -5.36 eV, respectively.

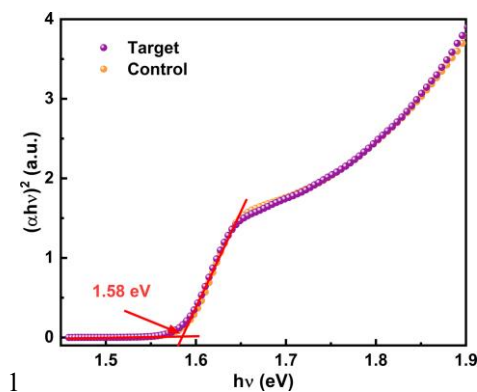

**Figure S26.** The  $E_{\text{g}}$  of the control and target perovskite films calculated from the Tauc plots.

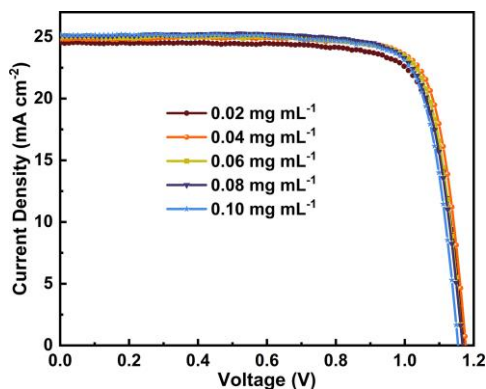

**Figure S27.** *J-V* curves of the PSCs based on different concentrations of COF-I.

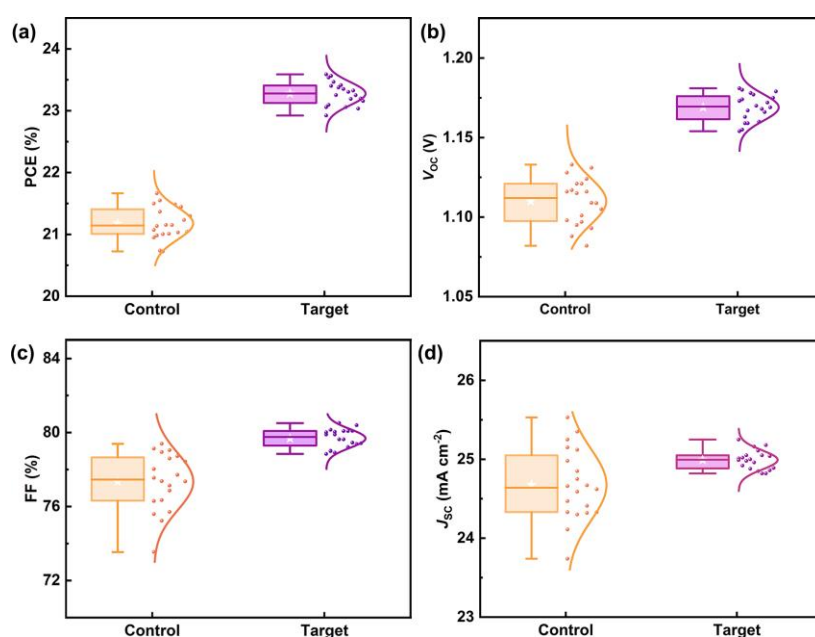

**Figure S28.** Device parameter statistics for 20 individual control and target PSCs. (a) PCE; (b)  $V_{OC}$ ; (c) FF; (d)  $J_{SC}$ . The center line represents the median value, the white pentagram represents the average value, the bounds of box indicate upper and lower quartiles and the whiskers represent the minimum and maximum values.

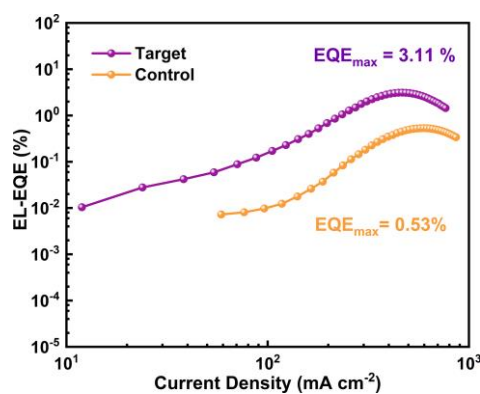

**Figure S29.** The EL-EQE curves for the control and target PSCs while operating as LEDs.

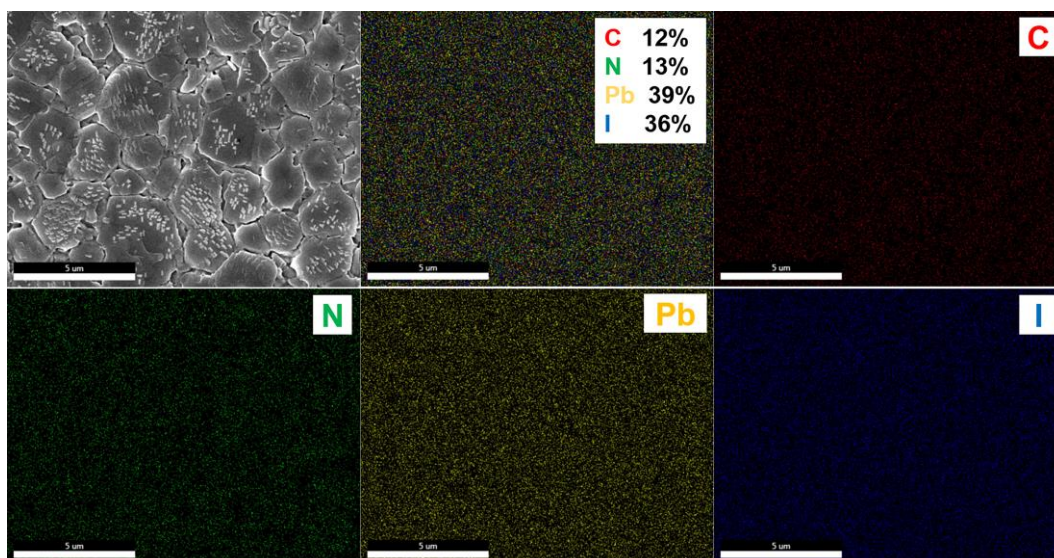

**Figure S30.** Top-view SEM image and EDS mapping of the target perovskite film after storage in air for 1000 hours.

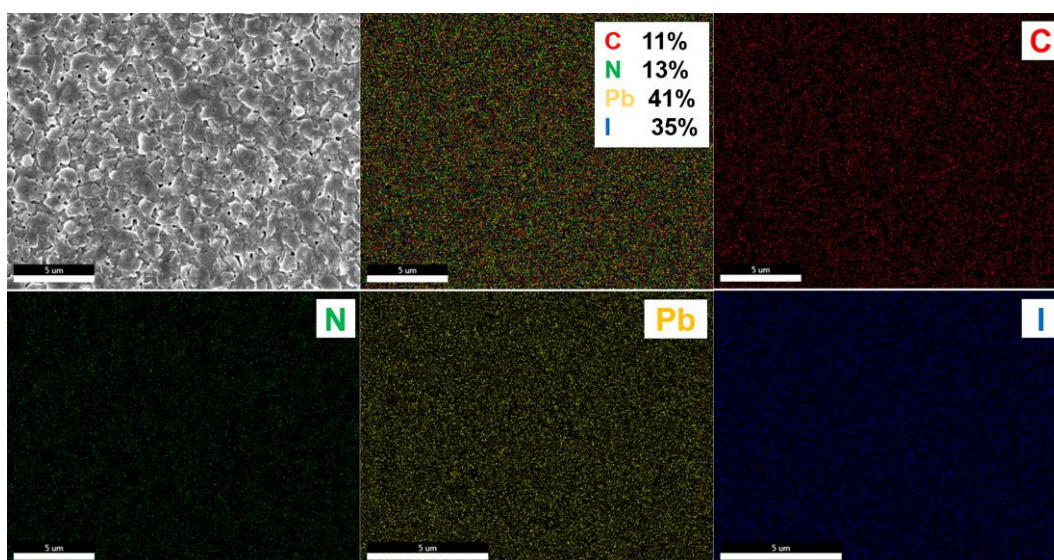

**Figure S31.** Top-view SEM image and EDS mapping of the control perovskite film after storage in air for 1000 hours.

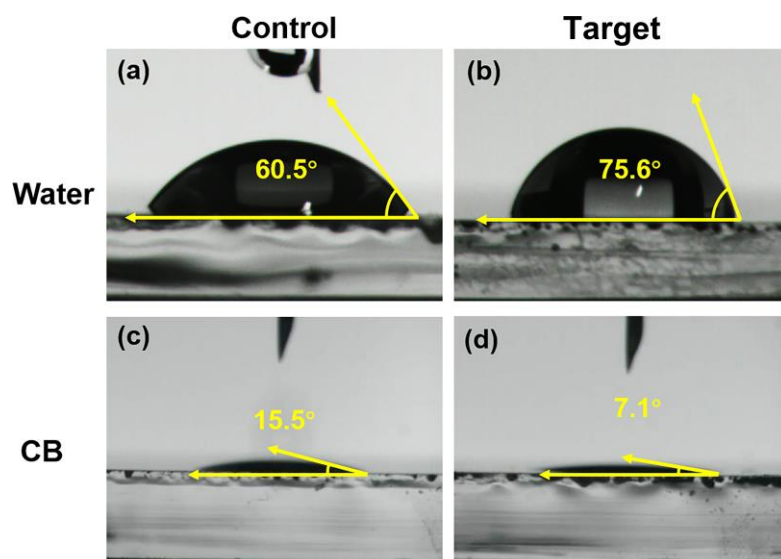

**Figure S32.** The contact angle measurements of the control and target perovskite films. (a) Water as solution for the control film; (b) Water as solution for the target perovskite film; (c) Chlorobenzene as solution for the control film, (d) Chlorobenzene as solution for the target perovskite film.

## Section S5: Tables

Table S1. Atomic coordinates and refined unit cell parameters of  $[(TPA)_2(TPB)_1]_{-C=N-}$ .

| Space Group                        | <i>C</i> <i>mcm</i> (No. 63) | a (Å)        | 54.5387 | b (Å)       | 20.5392 | c (Å)        | 11.2291 |
|------------------------------------|------------------------------|--------------|---------|-------------|---------|--------------|---------|
| Unit Cell Volume (Å <sup>3</sup> ) | 12578.6                      | $\alpha$ (°) | 90      | $\beta$ (°) | 90      | $\gamma$ (°) | 90      |
| Atom name                          | X                            | y            | z       | Atom name   | x       | y            | z       |
| C1                                 | 0.02725                      | 0.95841      | 0.92301 | C42         | 0.39632 | 0.5602       | 0.99317 |
| C2                                 | 0.97275                      | 0.04159      | 0.07699 | C43         | 0.39632 | 0.5602       | 0.50683 |
| C3                                 | 0.97275                      | 0.04159      | 0.42301 | C44         | 0.60368 | 0.4398       | 0.49317 |
| C4                                 | 0.02725                      | 0.95841      | 0.57699 | C45         | 0.39632 | 0.4398       | 0.49317 |
| C5                                 | 0.97275                      | 0.95841      | 0.57699 | C46         | 0.60368 | 0.5602       | 0.50683 |
| C6                                 | 0.02725                      | 0.04159      | 0.42301 | C47         | 0.60368 | 0.5602       | 0.99317 |
| C7                                 | 0.02725                      | 0.04159      | 0.07699 | C48         | 0.39632 | 0.4398       | 0.00683 |
| C8                                 | 0.97275                      | 0.95841      | 0.92301 | C49         | 0.09548 | 0.88816      | 0.0834  |
| C9                                 | 0.52725                      | 0.45841      | 0.92301 | C50         | 0.90452 | 0.11184      | 0.9166  |
| C10                                | 0.47275                      | 0.54159      | 0.07699 | C51         | 0.90452 | 0.11184      | 0.5834  |
| C11                                | 0.47275                      | 0.54159      | 0.42301 | C52         | 0.09548 | 0.88816      | 0.4166  |
| C12                                | 0.52725                      | 0.45841      | 0.57699 | C53         | 0.90452 | 0.88816      | 0.4166  |
| C13                                | 0.47275                      | 0.45841      | 0.57699 | C54         | 0.09548 | 0.11184      | 0.5834  |
| C14                                | 0.52725                      | 0.54159      | 0.42301 | C55         | 0.09548 | 0.11184      | 0.9166  |
| C15                                | 0.52725                      | 0.54159      | 0.07699 | C56         | 0.90452 | 0.88816      | 0.0834  |
| C16                                | 0.47275                      | 0.45841      | 0.92301 | C57         | 0.59548 | 0.38816      | 0.0834  |
| C17                                | 0.05293                      | 0.95852      | 0.92239 | C58         | 0.40452 | 0.61184      | 0.9166  |
| C18                                | 0.94707                      | 0.04148      | 0.07761 | C59         | 0.40452 | 0.61184      | 0.5834  |
| C19                                | 0.94707                      | 0.04148      | 0.42239 | C60         | 0.59548 | 0.38816      | 0.4166  |
| C20                                | 0.05293                      | 0.95852      | 0.57761 | C61         | 0.40452 | 0.38816      | 0.4166  |
| C21                                | 0.94707                      | 0.95852      | 0.57761 | C62         | 0.59548 | 0.61184      | 0.5834  |
| C22                                | 0.05293                      | 0.04148      | 0.42239 | C63         | 0.59548 | 0.61184      | 0.9166  |
| C23                                | 0.05293                      | 0.04148      | 0.07761 | C64         | 0.40452 | 0.38816      | 0.0834  |
| C24                                | 0.94707                      | 0.95852      | 0.92239 | C65         | 0.10763 | 0.82613      | 0.09048 |
| C25                                | 0.55293                      | 0.45852      | 0.92239 | C66         | 0.89237 | 0.17387      | 0.90952 |
| C26                                | 0.44707                      | 0.54148      | 0.07761 | C67         | 0.89237 | 0.17387      | 0.59048 |
| C27                                | 0.44707                      | 0.54148      | 0.42239 | C68         | 0.10763 | 0.82613      | 0.40952 |
| C28                                | 0.55293                      | 0.45852      | 0.57761 | C69         | 0.89237 | 0.82613      | 0.40952 |
| C29                                | 0.44707                      | 0.45852      | 0.57761 | C70         | 0.10763 | 0.17387      | 0.59048 |
| C30                                | 0.55293                      | 0.54148      | 0.42239 | C71         | 0.10763 | 0.17387      | 0.90952 |
| C31                                | 0.55293                      | 0.54148      | 0.07761 | C72         | 0.89237 | 0.82613      | 0.09048 |
| C32                                | 0.44707                      | 0.45852      | 0.92239 | C73         | 0.60763 | 0.32613      | 0.09048 |
| C33                                | 0.10368                      | 0.9398       | 0.00683 | C74         | 0.39237 | 0.67387      | 0.90952 |
| C34                                | 0.89632                      | 0.0602       | 0.99317 | C75         | 0.39237 | 0.67387      | 0.59048 |
| C35                                | 0.89632                      | 0.0602       | 0.50683 | C76         | 0.60763 | 0.32613      | 0.40952 |
| C36                                | 0.10368                      | 0.9398       | 0.49317 | C77         | 0.39237 | 0.32613      | 0.40952 |
| C37                                | 0.89632                      | 0.9398       | 0.49317 | C78         | 0.60763 | 0.67387      | 0.59048 |
| C38                                | 0.10368                      | 0.0602       | 0.50683 | C79         | 0.60763 | 0.67387      | 0.90952 |
| C39                                | 0.10368                      | 0.0602       | 0.99317 | C80         | 0.39237 | 0.32613      | 0.09048 |

## SUPPORTING INFORMATION

|      |         |         |         |      |         |         |         |
|------|---------|---------|---------|------|---------|---------|---------|
| C40  | 0.89632 | 0.9398  | 0.00683 | C81  | 0.12909 | 0.81382 | 0.02459 |
| C41  | 0.60368 | 0.4398  | 0.00683 | C82  | 0.87091 | 0.18618 | 0.97541 |
| C83  | 0.87091 | 0.18618 | 0.52459 | C132 | 0.14119 | 0.75183 | 0.46072 |
| C84  | 0.12909 | 0.81382 | 0.47541 | C133 | 0.85881 | 0.75183 | 0.46072 |
| C85  | 0.87091 | 0.81382 | 0.47541 | C134 | 0.14119 | 0.24817 | 0.53928 |
| C86  | 0.12909 | 0.18618 | 0.52459 | C135 | 0.14119 | 0.24817 | 0.96072 |
| C87  | 0.12909 | 0.18618 | 0.97541 | C136 | 0.85881 | 0.75183 | 0.03928 |
| C88  | 0.87091 | 0.81382 | 0.02459 | C137 | 0.64119 | 0.25183 | 0.03928 |
| C89  | 0.62909 | 0.31382 | 0.02459 | C138 | 0.35881 | 0.74817 | 0.96072 |
| C90  | 0.37091 | 0.68618 | 0.97541 | C139 | 0.35881 | 0.74817 | 0.53928 |
| C91  | 0.37091 | 0.68618 | 0.52459 | C140 | 0.64119 | 0.25183 | 0.46072 |
| C92  | 0.62909 | 0.31382 | 0.47541 | C141 | 0.35881 | 0.25183 | 0.46072 |
| C93  | 0.37091 | 0.31382 | 0.47541 | C142 | 0.64119 | 0.74817 | 0.53928 |
| C94  | 0.62909 | 0.68618 | 0.52459 | C143 | 0.64119 | 0.74817 | 0.96072 |
| C95  | 0.62909 | 0.68618 | 0.97541 | C144 | 0.35881 | 0.25183 | 0.03928 |
| C96  | 0.37091 | 0.31382 | 0.02459 | C145 | 0.17637 | 0.67938 | 0.9983  |
| C97  | 0.13738 | 0.86483 | 0.94707 | C146 | 0.82363 | 0.32062 | 0.0017  |
| C98  | 0.86262 | 0.13517 | 0.05293 | C147 | 0.82363 | 0.32062 | 0.4983  |
| C99  | 0.86262 | 0.13517 | 0.44707 | C148 | 0.17637 | 0.67938 | 0.5017  |
| C100 | 0.13738 | 0.86483 | 0.55293 | C149 | 0.82363 | 0.67938 | 0.5017  |
| C101 | 0.86262 | 0.86483 | 0.55293 | C150 | 0.17637 | 0.32062 | 0.4983  |
| C102 | 0.13738 | 0.13517 | 0.44707 | C151 | 0.17637 | 0.32062 | 0.0017  |
| C103 | 0.13738 | 0.13517 | 0.05293 | C152 | 0.82363 | 0.67938 | 0.9983  |
| C104 | 0.86262 | 0.86483 | 0.94707 | C153 | 0.67637 | 0.17938 | 0.9983  |
| C105 | 0.63738 | 0.36483 | 0.94707 | C154 | 0.32363 | 0.82062 | 0.0017  |
| C106 | 0.36262 | 0.63517 | 0.05293 | C155 | 0.32363 | 0.82062 | 0.4983  |
| C107 | 0.36262 | 0.63517 | 0.44707 | C156 | 0.67637 | 0.17938 | 0.5017  |
| C108 | 0.63738 | 0.36483 | 0.55293 | C157 | 0.32363 | 0.17938 | 0.5017  |
| C109 | 0.36262 | 0.36483 | 0.55293 | C158 | 0.67637 | 0.82062 | 0.4983  |
| C110 | 0.63738 | 0.63517 | 0.44707 | C159 | 0.67637 | 0.82062 | 0.0017  |
| C111 | 0.63738 | 0.63517 | 0.05293 | C160 | 0.32363 | 0.17938 | 0.9983  |
| C112 | 0.36262 | 0.36483 | 0.94707 | C161 | 0.17127 | 0.62673 | 0.0789  |
| C113 | 0.12471 | 0.92639 | 0.93758 | C162 | 0.82873 | 0.37327 | 0.9211  |
| C114 | 0.87529 | 0.07361 | 0.06242 | C163 | 0.82873 | 0.37327 | 0.5789  |
| C115 | 0.87529 | 0.07361 | 0.43758 | C164 | 0.17127 | 0.62673 | 0.4211  |
| C116 | 0.12471 | 0.92639 | 0.56242 | C165 | 0.82873 | 0.62673 | 0.4211  |
| C117 | 0.87529 | 0.92639 | 0.56242 | C166 | 0.17127 | 0.37327 | 0.5789  |
| C118 | 0.12471 | 0.07361 | 0.43758 | C167 | 0.17127 | 0.37327 | 0.9211  |
| C119 | 0.12471 | 0.07361 | 0.06242 | C168 | 0.82873 | 0.62673 | 0.0789  |
| C120 | 0.87529 | 0.92639 | 0.93758 | C169 | 0.67127 | 0.12673 | 0.0789  |
| C121 | 0.62471 | 0.42639 | 0.93758 | C170 | 0.32873 | 0.87327 | 0.9211  |
| C122 | 0.37529 | 0.57361 | 0.06242 | C171 | 0.32873 | 0.87327 | 0.5789  |
| C123 | 0.37529 | 0.57361 | 0.43758 | C172 | 0.67127 | 0.12673 | 0.4211  |
| C124 | 0.62471 | 0.42639 | 0.56242 | C173 | 0.32873 | 0.12673 | 0.4211  |
| C125 | 0.37529 | 0.42639 | 0.56242 | C174 | 0.67127 | 0.87327 | 0.5789  |
| C126 | 0.62471 | 0.57361 | 0.43758 | C175 | 0.67127 | 0.87327 | 0.9211  |
| C127 | 0.62471 | 0.57361 | 0.06242 | C176 | 0.32873 | 0.12673 | 0.0789  |
| C128 | 0.37529 | 0.42639 | 0.93758 | C177 | 0.18557 | 0.56809 | 0.0808  |
| C129 | 0.14119 | 0.75183 | 0.03928 | C178 | 0.81443 | 0.43191 | 0.9192  |

## SUPPORTING INFORMATION

|      |         |         |         |      |         |         |         |
|------|---------|---------|---------|------|---------|---------|---------|
| C130 | 0.85881 | 0.24817 | 0.96072 | C179 | 0.81443 | 0.43191 | 0.5808  |
| C131 | 0.85881 | 0.24817 | 0.53928 | C180 | 0.18557 | 0.56809 | 0.4192  |
| C181 | 0.81443 | 0.56809 | 0.4192  | C230 | 0.1967  | 0.32772 | 0.42284 |
| C182 | 0.18557 | 0.43191 | 0.5808  | C231 | 0.1967  | 0.32772 | 0.07716 |
| C183 | 0.18557 | 0.43191 | 0.9192  | C232 | 0.8033  | 0.67228 | 0.92284 |
| C184 | 0.81443 | 0.56809 | 0.0808  | C233 | 0.6967  | 0.17228 | 0.92284 |
| C185 | 0.68557 | 0.06809 | 0.0808  | C234 | 0.3033  | 0.82772 | 0.07716 |
| C186 | 0.31443 | 0.93191 | 0.9192  | C235 | 0.3033  | 0.82772 | 0.42284 |
| C187 | 0.31443 | 0.93191 | 0.5808  | C236 | 0.6967  | 0.17228 | 0.57716 |
| C188 | 0.68557 | 0.06809 | 0.4192  | C237 | 0.3033  | 0.17228 | 0.57716 |
| C189 | 0.31443 | 0.06809 | 0.4192  | C238 | 0.6967  | 0.82772 | 0.42284 |
| C190 | 0.68557 | 0.93191 | 0.5808  | C239 | 0.6967  | 0.82772 | 0.07716 |
| C191 | 0.68557 | 0.93191 | 0.9192  | C240 | 0.3033  | 0.17228 | 0.92284 |
| C192 | 0.31443 | 0.06809 | 0.0808  | C241 | 0.25651 | 0.45685 | 0.92388 |
| C193 | 0.20538 | 0.55946 | 0.002   | C242 | 0.74349 | 0.54315 | 0.07612 |
| C194 | 0.79462 | 0.44054 | 0.998   | C243 | 0.74349 | 0.54315 | 0.42388 |
| C195 | 0.79462 | 0.44054 | 0.502   | C244 | 0.25651 | 0.45685 | 0.57612 |
| C196 | 0.20538 | 0.55946 | 0.498   | C245 | 0.74349 | 0.45685 | 0.57612 |
| C197 | 0.79462 | 0.55946 | 0.498   | C246 | 0.25651 | 0.54315 | 0.42388 |
| C198 | 0.20538 | 0.44054 | 0.502   | C247 | 0.25651 | 0.54315 | 0.07612 |
| C199 | 0.20538 | 0.44054 | 0.998   | C248 | 0.74349 | 0.45685 | 0.92388 |
| C200 | 0.79462 | 0.55946 | 0.002   | C249 | 0.75651 | 0.95685 | 0.92388 |
| C201 | 0.70538 | 0.05946 | 0.002   | C250 | 0.24349 | 0.04315 | 0.07612 |
| C202 | 0.29462 | 0.94054 | 0.998   | C251 | 0.24349 | 0.04315 | 0.42388 |
| C203 | 0.29462 | 0.94054 | 0.502   | C252 | 0.75651 | 0.95685 | 0.57612 |
| C204 | 0.70538 | 0.05946 | 0.498   | C253 | 0.24349 | 0.95685 | 0.57612 |
| C205 | 0.29462 | 0.05946 | 0.498   | C254 | 0.75651 | 0.04315 | 0.42388 |
| C206 | 0.70538 | 0.94054 | 0.502   | C255 | 0.75651 | 0.04315 | 0.07612 |
| C207 | 0.70538 | 0.94054 | 0.998   | C256 | 0.24349 | 0.95685 | 0.92388 |
| C208 | 0.29462 | 0.05946 | 0.002   | C257 | 0.2822  | 0.45657 | 0.92418 |
| C209 | 0.21096 | 0.61316 | 0.92421 | C258 | 0.7178  | 0.54343 | 0.07582 |
| C210 | 0.78904 | 0.38684 | 0.07579 | C259 | 0.7178  | 0.54343 | 0.42418 |
| C211 | 0.78904 | 0.38684 | 0.42421 | C260 | 0.2822  | 0.45657 | 0.57582 |
| C212 | 0.21096 | 0.61316 | 0.57579 | C261 | 0.7178  | 0.45657 | 0.57582 |
| C213 | 0.78904 | 0.61316 | 0.57579 | C262 | 0.2822  | 0.54343 | 0.42418 |
| C214 | 0.21096 | 0.38684 | 0.42421 | C263 | 0.2822  | 0.54343 | 0.07582 |
| C215 | 0.21096 | 0.38684 | 0.07579 | C264 | 0.7178  | 0.45657 | 0.92418 |
| C216 | 0.78904 | 0.61316 | 0.92421 | C265 | 0.7822  | 0.95657 | 0.92418 |
| C217 | 0.71096 | 0.11316 | 0.92421 | C266 | 0.2178  | 0.04343 | 0.07582 |
| C218 | 0.28904 | 0.88684 | 0.07579 | C267 | 0.2178  | 0.04343 | 0.42418 |
| C219 | 0.28904 | 0.88684 | 0.42421 | C268 | 0.7822  | 0.95657 | 0.57582 |
| C220 | 0.71096 | 0.11316 | 0.57579 | C269 | 0.2178  | 0.95657 | 0.57582 |
| C221 | 0.28904 | 0.11316 | 0.57579 | C270 | 0.7822  | 0.04343 | 0.42418 |
| C222 | 0.71096 | 0.88684 | 0.42421 | C271 | 0.7822  | 0.04343 | 0.07582 |
| C223 | 0.71096 | 0.88684 | 0.07579 | C272 | 0.2178  | 0.95657 | 0.92418 |
| C224 | 0.28904 | 0.11316 | 0.92421 | C273 | 0.06631 | 0       | 0       |
| C225 | 0.1967  | 0.67228 | 0.92284 | C274 | 0.93369 | 0       | 0       |
| C226 | 0.8033  | 0.32772 | 0.07716 | C275 | 0.93369 | 0       | 0.5     |
| C227 | 0.8033  | 0.32772 | 0.42284 | C276 | 0.06631 | 0       | 0.5     |

## SUPPORTING INFORMATION

|      |         |         |         |      |         |         |         |
|------|---------|---------|---------|------|---------|---------|---------|
| C228 | 0.1967  | 0.67228 | 0.57716 | C277 | 0.56631 | 0.5     | 0       |
| C229 | 0.8033  | 0.67228 | 0.57716 | C278 | 0.43369 | 0.5     | 0       |
| C279 | 0.43369 | 0.5     | 0.5     | N24  | 0.59138 | 0.5     | 0.5     |
| C280 | 0.56631 | 0.5     | 0.5     | N25  | 0.21815 | 0.5     | 0       |
| C281 | 0.98685 | 0       | 0       | N26  | 0.78185 | 0.5     | 0       |
| C282 | 0.01315 | 0       | 0       | N27  | 0.78185 | 0.5     | 0.5     |
| C283 | 0.01315 | 0       | 0.5     | N28  | 0.21815 | 0.5     | 0.5     |
| C284 | 0.98685 | 0       | 0.5     | N29  | 0.71815 | 0       | 0       |
| C285 | 0.48685 | 0.5     | 0       | N30  | 0.28185 | 0       | 0       |
| C286 | 0.51315 | 0.5     | 0       | N31  | 0.28185 | 0       | 0.5     |
| C287 | 0.51315 | 0.5     | 0.5     | N32  | 0.71815 | 0       | 0.5     |
| C288 | 0.48685 | 0.5     | 0.5     | N33  | 0.31952 | 0.5     | 0       |
| C289 | 0.24317 | 0.5     | 0       | N34  | 0.68048 | 0.5     | 0       |
| C290 | 0.75683 | 0.5     | 0       | N35  | 0.68048 | 0.5     | 0.5     |
| C291 | 0.75683 | 0.5     | 0.5     | N36  | 0.31952 | 0.5     | 0.5     |
| C292 | 0.24317 | 0.5     | 0.5     | N37  | 0.81952 | 0       | 0       |
| C293 | 0.74317 | 0       | 0       | N38  | 0.18048 | 0       | 0       |
| C294 | 0.25683 | 0       | 0       | N39  | 0.18048 | 0       | 0.5     |
| C295 | 0.25683 | 0       | 0.5     | N40  | 0.81952 | 0       | 0.5     |
| C296 | 0.74317 | 0       | 0.5     | H1   | 0.01936 | 0.92635 | 0.86436 |
| C297 | 0.29506 | 0.5     | 0       | H2   | 0.98064 | 0.07365 | 0.13564 |
| C298 | 0.70494 | 0.5     | 0       | H3   | 0.98064 | 0.07365 | 0.36436 |
| C299 | 0.70494 | 0.5     | 0.5     | H4   | 0.01936 | 0.92635 | 0.63564 |
| C300 | 0.29506 | 0.5     | 0.5     | H5   | 0.98064 | 0.92635 | 0.63564 |
| C301 | 0.79506 | 0       | 0       | H6   | 0.01936 | 0.07365 | 0.36436 |
| C302 | 0.20494 | 0       | 0       | H7   | 0.01936 | 0.07365 | 0.13564 |
| C303 | 0.20494 | 0       | 0.5     | H8   | 0.98064 | 0.92635 | 0.86436 |
| C304 | 0.79506 | 0       | 0.5     | H9   | 0.51936 | 0.42635 | 0.86436 |
| N1   | 0.16288 | 0.73644 | 0.98821 | H10  | 0.48064 | 0.57365 | 0.13564 |
| N2   | 0.83712 | 0.26356 | 0.01179 | H11  | 0.48064 | 0.57365 | 0.36436 |
| N3   | 0.83712 | 0.26356 | 0.48821 | H12  | 0.51936 | 0.42635 | 0.63564 |
| N4   | 0.16288 | 0.73644 | 0.51179 | H13  | 0.48064 | 0.42635 | 0.63564 |
| N5   | 0.83712 | 0.73644 | 0.51179 | H14  | 0.51936 | 0.57365 | 0.36436 |
| N6   | 0.16288 | 0.26356 | 0.48821 | H15  | 0.51936 | 0.57365 | 0.13564 |
| N7   | 0.16288 | 0.26356 | 0.01179 | H16  | 0.48064 | 0.42635 | 0.86436 |
| N8   | 0.83712 | 0.73644 | 0.98821 | H17  | 0.06201 | 0.92789 | 0.86455 |
| N9   | 0.66288 | 0.23644 | 0.98821 | H18  | 0.93799 | 0.07211 | 0.13545 |
| N10  | 0.33712 | 0.76356 | 0.01179 | H19  | 0.93799 | 0.07211 | 0.36455 |
| N11  | 0.33712 | 0.76356 | 0.48821 | H20  | 0.06201 | 0.92789 | 0.63545 |
| N12  | 0.66288 | 0.23644 | 0.51179 | H21  | 0.93799 | 0.92789 | 0.63545 |
| N13  | 0.33712 | 0.23644 | 0.51179 | H22  | 0.06201 | 0.07211 | 0.36455 |
| N14  | 0.66288 | 0.76356 | 0.48821 | H23  | 0.06201 | 0.07211 | 0.13545 |
| N15  | 0.66288 | 0.76356 | 0.01179 | H24  | 0.93799 | 0.92789 | 0.86455 |
| N16  | 0.33712 | 0.23644 | 0.98821 | H25  | 0.56201 | 0.42789 | 0.86455 |
| N17  | 0.09138 | 0       | 0       | H26  | 0.43799 | 0.57211 | 0.13545 |
| N18  | 0.90862 | 0       | 0       | H27  | 0.43799 | 0.57211 | 0.36455 |
| N19  | 0.90862 | 0       | 0.5     | H28  | 0.56201 | 0.42789 | 0.63545 |
| N20  | 0.09138 | 0       | 0.5     | H29  | 0.43799 | 0.42789 | 0.63545 |
| N21  | 0.59138 | 0.5     | 0       | H30  | 0.56201 | 0.57211 | 0.36455 |



## SUPPORTING INFORMATION

|     |         |         |         |      |         |         |         |
|-----|---------|---------|---------|------|---------|---------|---------|
| N22 | 0.40862 | 0.5     | 0       | H31  | 0.56201 | 0.57211 | 0.13545 |
| N23 | 0.40862 | 0.5     | 0.5     | H32  | 0.43799 | 0.42789 | 0.86455 |
| H33 | 0.08039 | 0.89545 | 0.135   | H82  | 0.86908 | 0.03813 | 0.12063 |
| H34 | 0.91961 | 0.10455 | 0.865   | H83  | 0.86908 | 0.03813 | 0.37937 |
| H35 | 0.91961 | 0.10455 | 0.635   | H84  | 0.13092 | 0.96187 | 0.62063 |
| H36 | 0.08039 | 0.89545 | 0.365   | H85  | 0.86908 | 0.96187 | 0.62063 |
| H37 | 0.91961 | 0.89545 | 0.365   | H86  | 0.13092 | 0.03813 | 0.37937 |
| H38 | 0.08039 | 0.10455 | 0.635   | H87  | 0.13092 | 0.03813 | 0.12063 |
| H39 | 0.08039 | 0.10455 | 0.865   | H88  | 0.86908 | 0.96187 | 0.87937 |
| H40 | 0.91961 | 0.89545 | 0.135   | H89  | 0.63092 | 0.46187 | 0.87937 |
| H41 | 0.58039 | 0.39545 | 0.135   | H90  | 0.36908 | 0.53813 | 0.12063 |
| H42 | 0.41961 | 0.60455 | 0.865   | H91  | 0.36908 | 0.53813 | 0.37937 |
| H43 | 0.41961 | 0.60455 | 0.635   | H92  | 0.63092 | 0.46187 | 0.62063 |
| H44 | 0.58039 | 0.39545 | 0.365   | H93  | 0.36908 | 0.46187 | 0.62063 |
| H45 | 0.41961 | 0.39545 | 0.365   | H94  | 0.63092 | 0.53813 | 0.37937 |
| H46 | 0.58039 | 0.60455 | 0.635   | H95  | 0.63092 | 0.53813 | 0.12063 |
| H47 | 0.58039 | 0.60455 | 0.865   | H96  | 0.36908 | 0.46187 | 0.87937 |
| H48 | 0.41961 | 0.39545 | 0.135   | H97  | 0.13298 | 0.71674 | 0.09207 |
| H49 | 0.10058 | 0.78996 | 0.145   | H98  | 0.86702 | 0.28326 | 0.90793 |
| H50 | 0.89942 | 0.21004 | 0.855   | H99  | 0.86702 | 0.28326 | 0.59207 |
| H51 | 0.89942 | 0.21004 | 0.645   | H100 | 0.13298 | 0.71674 | 0.40793 |
| H52 | 0.10058 | 0.78996 | 0.355   | H101 | 0.86702 | 0.71674 | 0.40793 |
| H53 | 0.89942 | 0.78996 | 0.355   | H102 | 0.13298 | 0.28326 | 0.59207 |
| H54 | 0.10058 | 0.21004 | 0.645   | H103 | 0.13298 | 0.28326 | 0.90793 |
| H55 | 0.10058 | 0.21004 | 0.855   | H104 | 0.86702 | 0.71674 | 0.09207 |
| H56 | 0.89942 | 0.78996 | 0.145   | H105 | 0.63298 | 0.21674 | 0.09207 |
| H57 | 0.60058 | 0.28996 | 0.145   | H106 | 0.36702 | 0.78326 | 0.90793 |
| H58 | 0.39942 | 0.71004 | 0.855   | H107 | 0.36702 | 0.78326 | 0.59207 |
| H59 | 0.39942 | 0.71004 | 0.645   | H108 | 0.63298 | 0.21674 | 0.40793 |
| H60 | 0.60058 | 0.28996 | 0.355   | H109 | 0.36702 | 0.21674 | 0.40793 |
| H61 | 0.39942 | 0.28996 | 0.355   | H110 | 0.63298 | 0.78326 | 0.59207 |
| H62 | 0.60058 | 0.71004 | 0.645   | H111 | 0.63298 | 0.78326 | 0.90793 |
| H63 | 0.60058 | 0.71004 | 0.855   | H112 | 0.36702 | 0.21674 | 0.09207 |
| H64 | 0.39942 | 0.28996 | 0.145   | H113 | 0.15711 | 0.63001 | 0.13704 |
| H65 | 0.15268 | 0.85735 | 0.89685 | H114 | 0.84289 | 0.36999 | 0.86296 |
| H66 | 0.84732 | 0.14265 | 0.10315 | H115 | 0.84289 | 0.36999 | 0.63704 |
| H67 | 0.84732 | 0.14265 | 0.39685 | H116 | 0.15711 | 0.63001 | 0.36296 |
| H68 | 0.15268 | 0.85735 | 0.60315 | H117 | 0.84289 | 0.63001 | 0.36296 |
| H69 | 0.84732 | 0.85735 | 0.60315 | H118 | 0.15711 | 0.36999 | 0.63704 |
| H70 | 0.15268 | 0.14265 | 0.39685 | H119 | 0.15711 | 0.36999 | 0.86296 |
| H71 | 0.15268 | 0.14265 | 0.10315 | H120 | 0.84289 | 0.63001 | 0.13704 |
| H72 | 0.84732 | 0.85735 | 0.89685 | H121 | 0.65711 | 0.13001 | 0.13704 |
| H73 | 0.65268 | 0.35735 | 0.89685 | H122 | 0.34289 | 0.86999 | 0.86296 |
| H74 | 0.34732 | 0.64265 | 0.10315 | H123 | 0.34289 | 0.86999 | 0.63704 |
| H75 | 0.34732 | 0.64265 | 0.39685 | H124 | 0.65711 | 0.13001 | 0.36296 |
| H76 | 0.65268 | 0.35735 | 0.60315 | H125 | 0.34289 | 0.13001 | 0.36296 |
| H77 | 0.34732 | 0.35735 | 0.60315 | H126 | 0.65711 | 0.86999 | 0.63704 |
| H78 | 0.65268 | 0.64265 | 0.39685 | H127 | 0.65711 | 0.86999 | 0.86296 |
| H79 | 0.65268 | 0.64265 | 0.10315 | H128 | 0.34289 | 0.13001 | 0.13704 |

## SUPPORTING INFORMATION

|      |         |         |         |      |         |         |         |
|------|---------|---------|---------|------|---------|---------|---------|
| H80  | 0.34732 | 0.35735 | 0.89685 | H129 | 0.1813  | 0.53088 | 0.13971 |
| H81  | 0.13092 | 0.96187 | 0.87937 | H130 | 0.8187  | 0.46912 | 0.86029 |
| H131 | 0.8187  | 0.46912 | 0.63971 | H178 | 0.7525  | 0.57469 | 0.13265 |
| H132 | 0.1813  | 0.53088 | 0.36029 | H179 | 0.7525  | 0.57469 | 0.36735 |
| H133 | 0.8187  | 0.53088 | 0.36029 | H180 | 0.2475  | 0.42531 | 0.63265 |
| H134 | 0.1813  | 0.46912 | 0.63971 | H181 | 0.7525  | 0.42531 | 0.63265 |
| H135 | 0.1813  | 0.46912 | 0.86029 | H182 | 0.2475  | 0.57469 | 0.36735 |
| H136 | 0.8187  | 0.53088 | 0.13971 | H183 | 0.2475  | 0.57469 | 0.13265 |
| H137 | 0.6813  | 0.03088 | 0.13971 | H184 | 0.7525  | 0.42531 | 0.86735 |
| H138 | 0.3187  | 0.96912 | 0.86029 | H185 | 0.7475  | 0.92531 | 0.86735 |
| H139 | 0.3187  | 0.96912 | 0.63971 | H186 | 0.2525  | 0.07469 | 0.13265 |
| H140 | 0.6813  | 0.03088 | 0.36029 | H187 | 0.2525  | 0.07469 | 0.36735 |
| H141 | 0.3187  | 0.03088 | 0.36029 | H188 | 0.7475  | 0.92531 | 0.63265 |
| H142 | 0.6813  | 0.96912 | 0.63971 | H189 | 0.2525  | 0.92531 | 0.63265 |
| H143 | 0.6813  | 0.96912 | 0.86029 | H190 | 0.7475  | 0.07469 | 0.36735 |
| H144 | 0.3187  | 0.03088 | 0.13971 | H191 | 0.7475  | 0.07469 | 0.13265 |
| H145 | 0.22533 | 0.60895 | 0.86701 | H192 | 0.2525  | 0.92531 | 0.86735 |
| H146 | 0.77467 | 0.39105 | 0.13299 | H193 | 0.2915  | 0.4248  | 0.86919 |
| H147 | 0.77467 | 0.39105 | 0.36701 | H194 | 0.7085  | 0.5752  | 0.13081 |
| H148 | 0.22533 | 0.60895 | 0.63299 | H195 | 0.7085  | 0.5752  | 0.36919 |
| H149 | 0.77467 | 0.60895 | 0.63299 | H196 | 0.2915  | 0.4248  | 0.63081 |
| H150 | 0.22533 | 0.39105 | 0.36701 | H197 | 0.7085  | 0.4248  | 0.63081 |
| H151 | 0.22533 | 0.39105 | 0.13299 | H198 | 0.2915  | 0.5752  | 0.36919 |
| H152 | 0.77467 | 0.60895 | 0.86701 | H199 | 0.2915  | 0.5752  | 0.13081 |
| H153 | 0.72533 | 0.10895 | 0.86701 | H200 | 0.7085  | 0.4248  | 0.86919 |
| H154 | 0.27467 | 0.89105 | 0.13299 | H201 | 0.7915  | 0.9248  | 0.86919 |
| H155 | 0.27467 | 0.89105 | 0.36701 | H202 | 0.2085  | 0.0752  | 0.13081 |
| H156 | 0.72533 | 0.10895 | 0.63299 | H203 | 0.2085  | 0.0752  | 0.36919 |
| H157 | 0.27467 | 0.10895 | 0.63299 | H204 | 0.7915  | 0.9248  | 0.63081 |
| H158 | 0.72533 | 0.89105 | 0.36701 | H205 | 0.2085  | 0.9248  | 0.63081 |
| H159 | 0.72533 | 0.89105 | 0.13299 | H206 | 0.7915  | 0.0752  | 0.36919 |
| H160 | 0.27467 | 0.10895 | 0.86701 | H207 | 0.7915  | 0.0752  | 0.13081 |
| H161 | 0.20105 | 0.71023 | 0.86549 | H208 | 0.2085  | 0.9248  | 0.86919 |
| H162 | 0.79895 | 0.28977 | 0.13451 | H209 | 0.32839 | 0.46977 | 0.94833 |
| H163 | 0.79895 | 0.28977 | 0.36549 | H210 | 0.67161 | 0.53023 | 0.05167 |
| H164 | 0.20105 | 0.71023 | 0.63451 | H211 | 0.67161 | 0.53023 | 0.44833 |
| H165 | 0.79895 | 0.71023 | 0.63451 | H212 | 0.32839 | 0.46977 | 0.55167 |
| H166 | 0.20105 | 0.28977 | 0.36549 | H213 | 0.67161 | 0.46977 | 0.55167 |
| H167 | 0.20105 | 0.28977 | 0.13451 | H214 | 0.32839 | 0.53023 | 0.44833 |
| H168 | 0.79895 | 0.71023 | 0.86549 | H215 | 0.32839 | 0.53023 | 0.05167 |
| H169 | 0.70105 | 0.21023 | 0.86549 | H216 | 0.67161 | 0.46977 | 0.94833 |
| H170 | 0.29895 | 0.78977 | 0.13451 | H217 | 0.82839 | 0.96977 | 0.94833 |
| H171 | 0.29895 | 0.78977 | 0.36549 | H218 | 0.17161 | 0.03023 | 0.05167 |
| H172 | 0.70105 | 0.21023 | 0.63451 | H219 | 0.17161 | 0.03023 | 0.44833 |
| H173 | 0.29895 | 0.21023 | 0.63451 | H220 | 0.82839 | 0.96977 | 0.55167 |
| H174 | 0.70105 | 0.78977 | 0.36549 | H221 | 0.17161 | 0.96977 | 0.55167 |
| H175 | 0.70105 | 0.78977 | 0.13451 | H222 | 0.82839 | 0.03023 | 0.44833 |
| H176 | 0.29895 | 0.21023 | 0.86549 | H223 | 0.82839 | 0.03023 | 0.05167 |
| H177 | 0.2475  | 0.42531 | 0.86735 | H224 | 0.17161 | 0.96977 | 0.94833 |

## SUPPORTING INFORMATION

**Table S2.** The obtained carrier lifetimes of the control and target perovskite films.

| Sample  | A <sub>1</sub> (%) | τ <sub>1</sub> (ns) | A <sub>2</sub> (%) | τ <sub>2</sub> (ns) | τ <sub>av</sub> (ns) |
|---------|--------------------|---------------------|--------------------|---------------------|----------------------|
| Control | 1.41               | 70.5                | 98.59              | 984.6               | 832.2                |
| Target  | 11.85              | 73.15               | 88.15              | 290.2               | 214.7                |

TRPL fitting results obtained using bi-exponential decay equation

$$y = A_1 e^{-\frac{x-x_0}{\tau_1}} + A_2 e^{-\frac{x-x_0}{\tau_2}}$$

where, A<sub>1</sub> and τ<sub>1</sub> are amplitude and time constant for fast decay component and A<sub>2</sub> and τ<sub>2</sub> are amplitude and time constant for slow decay component. The average lifetime (τ<sub>av</sub>) is calculated from

$$\tau_{ave} = \frac{A_1 \tau_1^2 + A_2 \tau_2^2}{A_1 \tau_1 + A_2 \tau_2}$$

The excitation wavelength is 500 nm.

**Table S3.** Parameters for the SCLC devices

| Sample  | V <sub>TFL</sub> (h)<br>[V] | N <sub>t</sub> (h)<br>[×10 <sup>15</sup> cm <sup>-3</sup> ] | μ <sub>h</sub><br>[cm <sup>-2</sup> V <sup>-1</sup> s <sup>-1</sup> ] | V <sub>TFL</sub> (e)<br>[V] | N <sub>t</sub> (e)<br>[×10 <sup>15</sup> cm <sup>-3</sup> ] | μ <sub>e</sub><br>[cm <sup>-2</sup> V <sup>-1</sup> s <sup>-1</sup> ] |
|---------|-----------------------------|-------------------------------------------------------------|-----------------------------------------------------------------------|-----------------------------|-------------------------------------------------------------|-----------------------------------------------------------------------|
| Target  | 0.77                        | 6.95                                                        | 3.72                                                                  | 0.25                        | 2.25                                                        | 3.88                                                                  |
| Control | 1.06                        | 9.56                                                        | 1.02                                                                  | 0.68                        | 6.16                                                        | 3.14                                                                  |

**Table S4.** Photovoltaic parameters of PSCs based on different amount of COF-I.

| Concentration [mg mL <sup>-1</sup> ] | V <sub>oc</sub> [V] | FF [%] | J <sub>sc</sub> [mA cm <sup>-2</sup> ] | PCE [%] |
|--------------------------------------|---------------------|--------|----------------------------------------|---------|
| 0.02                                 | 1.174               | 78.53  | 24.54                                  | 22.62   |
| 0.04                                 | 1.177               | 80.69  | 24.81                                  | 23.56   |
| 0.06                                 | 1.167               | 80.39  | 24.92                                  | 23.38   |
| 0.08                                 | 1.163               | 79.37  | 25.03                                  | 23.10   |
| 0.10                                 | 1.155               | 79.03  | 25.18                                  | 22.98   |

## References

- [1] 刘西成, 刘新宇, 周平, 李锦杰, 田浩泽, 李祥高, Synthesis, Characterization and Properties of Bipolar Triphenylamine Charge Transport Materials, Chinese Journal of Structural Chemistry 38 (2019) 533-540. <https://doi.org/10.14102/j.cnki.0254-5861.2011-2183>.
- [2] Y. Nakano, T. Yagyu, T. Hirayama, A. Ito, K. Tanaka, Synthesis and intramolecular magnetic interaction of triphenylamine derivatives with nitronyl nitroxide radicals, Polyhedron 24 (2005) 2141-2147. <https://doi.org/https://doi.org/10.1016/j.poly.2005.03.031>.
- [3] H.L. Nguyen, C. Gropp, O.M. Yaghi, Reticulating 1D Ribbons into 2D Covalent Organic Frameworks by Imine and Imide Linkages, Journal of the American Chemical Society 142 (2020) 2771-2776. <https://doi.org/10.1021/jacs.9b13971>.
- [4] G. Kresse, J. Furthmüller, Efficiency of ab-initio total energy calculations for metals and semiconductors using a plane-wave basis set, Computational Materials Science 6 (1996) 15-50. [https://doi.org/https://doi.org/10.1016/0927-0256\(96\)00008-0](https://doi.org/https://doi.org/10.1016/0927-0256(96)00008-0).
- [5] G. Kresse, J. Furthmüller, Efficient iterative schemes for ab initio total-energy calculations using a plane-wave basis set, Physical Review B 54 (1996) 11169-11186. <https://doi.org/10.1103/PhysRevB.54.11169>.
- [6] P.E. Blöchl, Projector augmented-wave method, Physical Review B 50 (1994) 17953-17979. <https://doi.org/10.1103/PhysRevB.50.17953>.
- [7] G. Kresse, D. Joubert, From ultrasoft pseudopotentials to the projector augmented-wave method, Physical Review B 59 (1999) 1758-1775. <https://doi.org/10.1103/PhysRevB.59.1758>.
- [8] J.P. Perdew, K. Burke, M. Ernzerhof, Generalized Gradient Approximation Made Simple, Physical Review Letters 77 (1996) 3865-3868. <https://doi.org/10.1103/PhysRevLett.77.3865>.
- [9] L. Bengtsson, Dipole correction for surface supercell calculations, Physical Review B 59 (1999) 12301-12304. <https://doi.org/10.1103/PhysRevB.59.12301>.
